# Supplementary material for: MicroRNA-223 restricts liver fibrosis by inhibiting the TAZ-IHH-GLI2 and PDGF signaling pathways via the crosstalk of multiple liver cell types
Source: PubMed Central journal article supplement (PMC8040312; doi:10.7150/ijbs.58365), 2021-03-11
Supplement: ijbsv17p1153s1.pdf [file ijbsv17p1153s1.pdf]

# MicroRNA-223 restricts liver fibrosis by inhibiting the TAZ-IHH-GLI2 and PDGF signaling pathways via the crosstalk of multiple liver cell types

Xiaolin Wang<sup>1,2</sup>, Wonhyo Seo<sup>1</sup>, Seol Hee Park<sup>1</sup>, Yaojie Fu<sup>1</sup>, Seonghwan Hwang<sup>1</sup>, Robim M. Rodrigues<sup>1</sup>, Dechun Feng<sup>1</sup>, Bin Gao<sup>1\*</sup>, Yong He<sup>1\*</sup>

## Supporting Materials

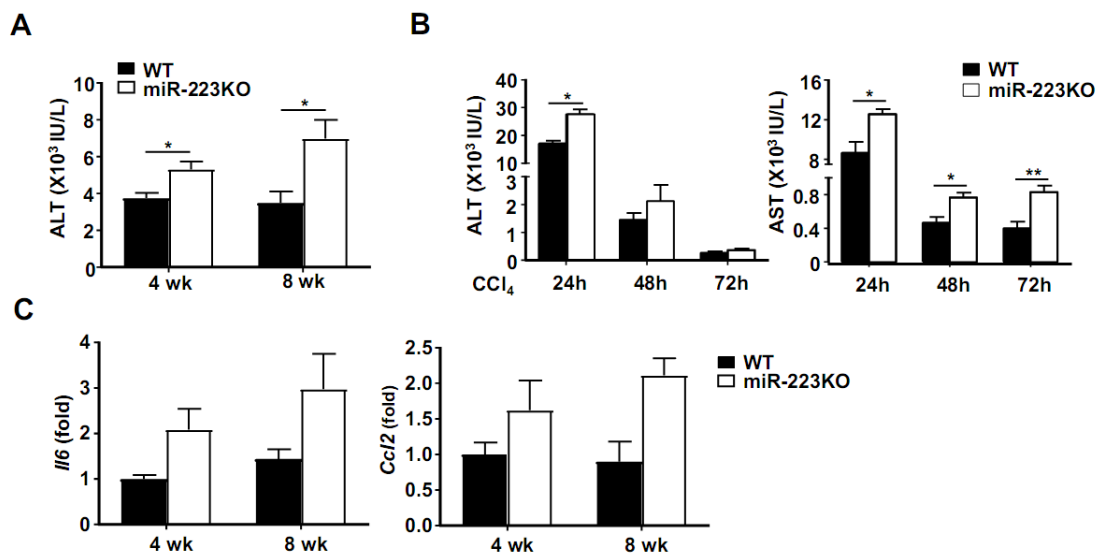

**Supplementary Figure S1. MiR-223KO mice are more susceptible to CCl<sub>4</sub>-induced liver injury.** WT and miR-223KO mice were treated with CCl<sub>4</sub> twice a week for 4 weeks or 8 weeks (n=5-8/group) (A,C). (A) The ALT levels were measured. (B) WT and miR-223KO mice were treated with CCl<sub>4</sub> for the indicated time points. Serum ALT and AST levels were measured. (C) RT-qPCR analyses of the expression of *I/6* and *Ccl2* in the liver from WT and miR-223KO mice. Values represent means  $\pm$  SEM. \* $P$ < 0.05, \*\* $P$ < 0.01.

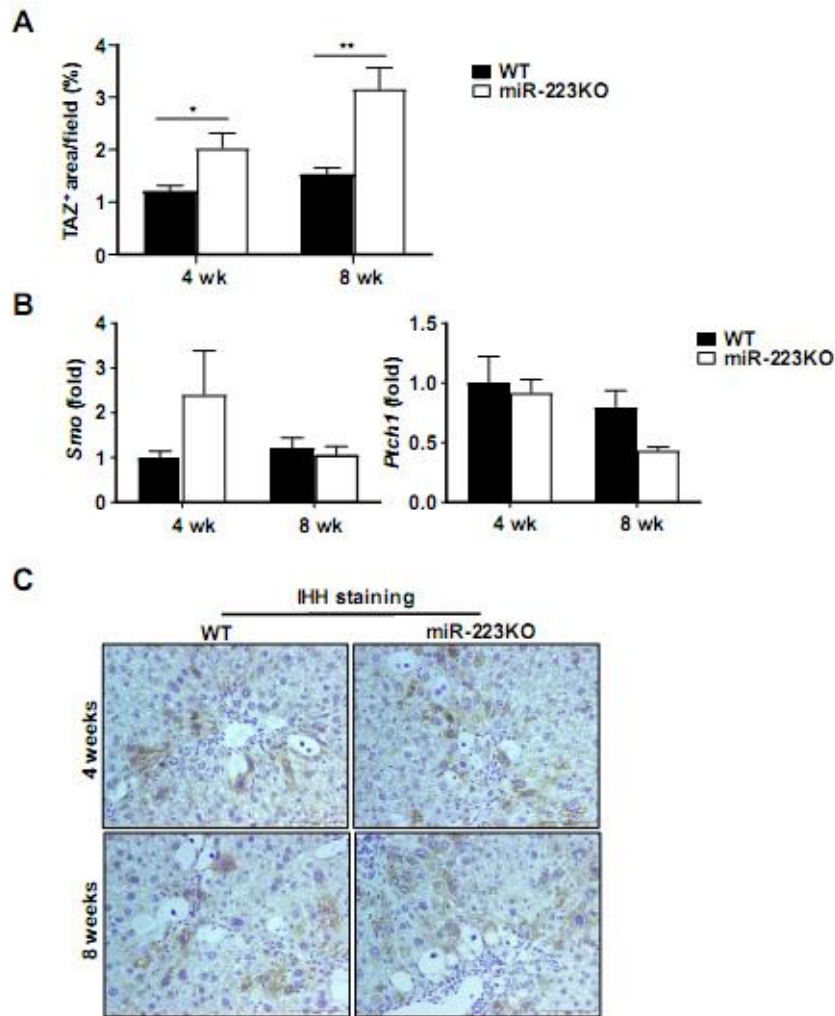

**Supplementary Figure S2. MiR-223KO mice show higher levels of IHH expression after chronic CCl<sub>4</sub> injection.** WT and miR-223KO mice were treated with CCl<sub>4</sub> twice a week for 4 weeks or 8 weeks (n=5-8/group). (A) Quantification of TAZ<sup>+</sup> area per field. (B) RT-qPCR analyses of the expression profiles of the genes related to Hedgehog signaling pathway in the liver from WT and miR-223KO mice. (C) Representative images of IHH staining are shown. Values represent means  $\pm$  SEM. \* $P$  < 0.05, \*\* $P$  < 0.01.

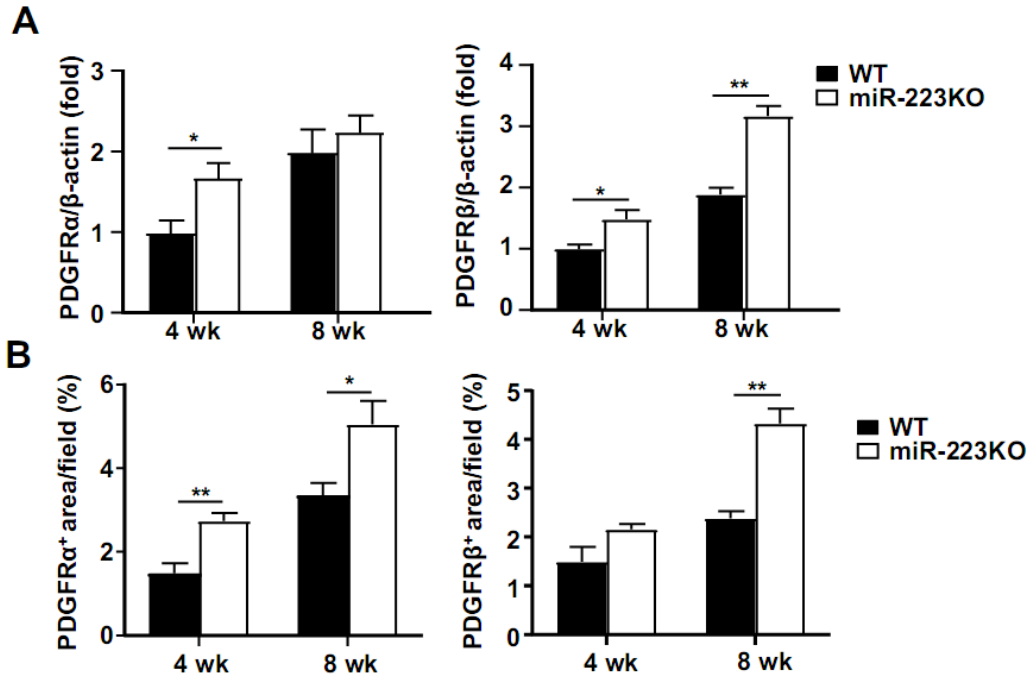

**Supplementary Figure S3. Expression quantification of several proteins in western blot and immunohistochemistry staining as shown in Fig. 4B and 4C. Values represent means  $\pm$  SEM. \* $P$  < 0.05, \*\* $P$  < 0.01 as compared to WT group.**

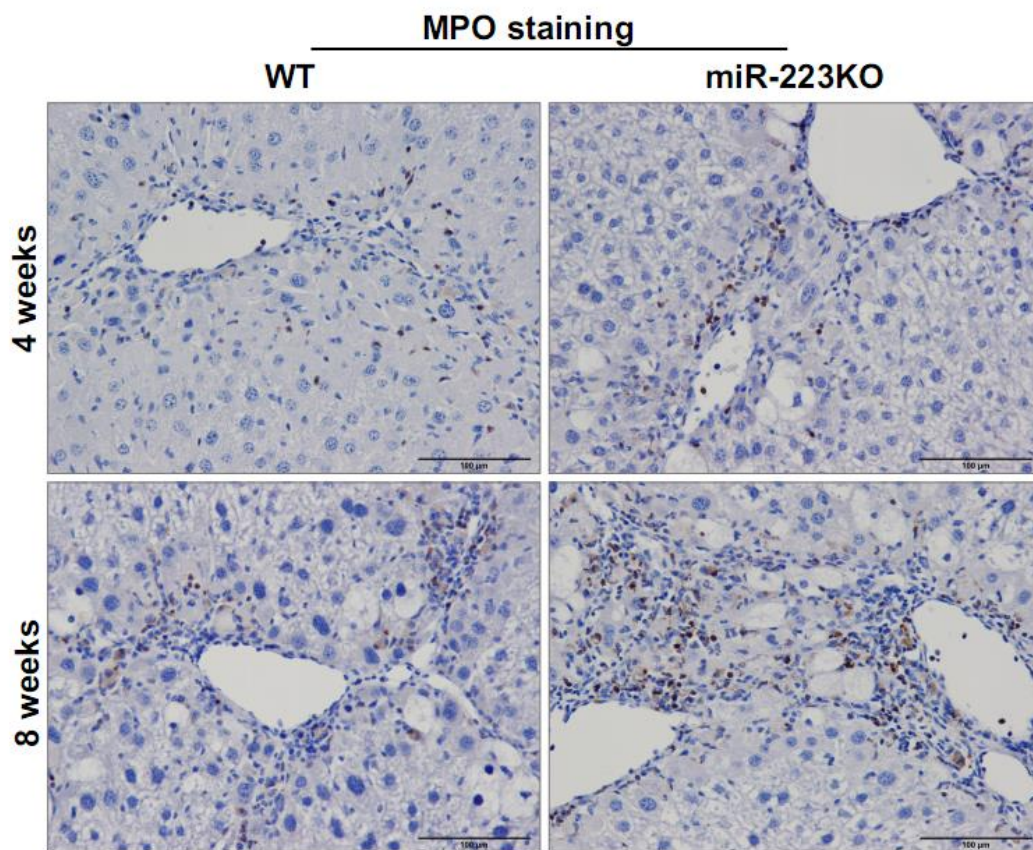

**Supplementary Figure S4. MiR-223KO mice have more liver neutrophil infiltration after chronic CCl<sub>4</sub> injection.** WT and miR-223KO mice were treated with CCl<sub>4</sub> twice a week for 4 weeks or 8 weeks. Representative images of MPO staining are shown.

**Supporting Table 1. Primer sequences for mouse and human genes used in reverse transcription-qPCR.**

| Mouse Genes   | Forward primer (5'–3')      | Reverse primer (5'–3')  |
|---------------|-----------------------------|-------------------------|
| <i>Ilf6</i>   | TCCATCCAGTTGCCTTCTTG        | TTCCACGATTTCCCAGAGAAC   |
| <i>Ccl2</i>   | CCAGCCTACTCATTGGGAT         | GGGCCTGCTGTTACAGTT      |
| <i>Ccl3</i>   | TGAGAGTCTTGAGGCAGCGA        | TGTGGCTACTTGGCAGCAAACA  |
| <i>Ccl4</i>   | AACACCATGAAGCTCTGCGT        | AGAAACAGCAGGAAGTGGGA    |
| <i>Acta2</i>  | TCCTGACGCTGAAGTATCCGATA     | GGTGCCAGATCTTTTCCATGTC  |
| <i>Col1a1</i> | TAGGCCATTGTGTATGCAGC        | ACATGTTTCCAGCTTTGTGGACC |
| <i>Col1a2</i> | GGTGAGCCTGGTCAAACGG         | ACTGTGTCCTTTTACGCCTTT   |
| <i>Col3a1</i> | TAGGACTGACCAAGGTGGCT        | GGAACCTGGTTTCTTCTCACC   |
| <i>Col4a2</i> | GACCGAGTGCGGTTCAAAG         | CGCAGGGCACATCCAACCTT    |
| <i>Mmp-13</i> | CTTTGGCTTAGAGGTGACTGG       | AGGCACTCCACATCTTGGTTT   |
| <i>Vim</i>    | TCCACTTTCCGTTCAAGGTC        | AGAGAGAGGAAGCCGAAAGC    |
| <i>Ccnd1</i>  | GCGTACCCTGACACCAATCTC       | CTCCTCTTCGCACTTCTGCTC   |
| <i>Ccne1</i>  | TCCACGCATGCTGAATTATC        | TTGCAAGACCCAGATGAAGA    |
| <i>Tgfb1</i>  | GACCCTGCCCTATATTTGGA        | CCGGGTTGTGTTGGTTGTAGA   |
| <i>18s</i>    | AACTTTTCGATGGTAGTCGCCGT     | TCCTTGGATGTGGTAGCCGTTT  |
| <i>Gli2</i>   | GTTCCAAGGCCTACTCTCGCCT<br>G | CTTGAGCAGTGGAGCACGGACAT |
| <i>Gli3</i>   | CACAGCTCTACGGCGACTG         | CTGCATAGTGATTGCGTTTCTTC |
| <i>Pdgfra</i> | TCCATGCTAGACTCAGAAGTCA      | TCCCGGTGGACACAATTTTTC   |
| <i>Pdgfrb</i> | AGGGGGCGTGATGACTAGG         | TTCCAGGAGTGATACCAGCTT   |
| <i>Opn</i>    | TGGCTATAGGATCTGGGTGC        | ATTTGCTTTTGCCTGTTTGG    |

| Human genes  | Forward primer (5'–3') | Reverse primer (5'–3') |
|--------------|------------------------|------------------------|
| <i>ACTA2</i> | GTGACGAAGCACAGAGCAAA   | CTTTTCCATGTTCGTCCCAGT  |

|               |                        |                         |
|---------------|------------------------|-------------------------|
| <i>COL1A1</i> | CAGATCACGTCATCGCACAA   | TGTGAGGCCACGCATGAG      |
| <i>COL3A1</i> | AGGACTGACCAAGATGGGAA   | AGGGGAGCTGGCTACTTCTC    |
| <i>COL4A1</i> | CCTTTTGTCCCTTCACTCCA   | CTCCACGAGGAGCACAGC      |
| <i>18S</i>    | GGCCCTGTAATTGGAATGAGTC | CCAAGATCCAACACTACGAGCTT |
| <i>TGFB1</i>  | CTTCCAGCCGAGGTCCTT     | CCCTGGACACCAACTATTGC    |
| <i>VIM</i>    | ATTCCACTTTGCGTTCAAGG   | CTTCAGAGAGAGGAAGCCGA    |
| <i>CCNE</i>   | TCTTTGTCAGGTGTGGGGA    | GAAATGGCCAAAATCGACAG    |
